# Supplementary material
Source: ML conference proceedings conference paper supplement (https://openaccess.thecvf.com/content/CVPR2022/html/Simon_On_Generalizing_Beyond_CVPR_2022_paper.html)
Supplement: Supplementary file 1 [file Simon_On_Generalizing_Beyond_CVPR_2022_supplemental.pdf]

# On Generalizing Beyond Domains in Cross-Domain Continual Learning

## Supplementary Material

Christian Simon<sup>1,3,5</sup> Masoud Faraki<sup>2</sup> Yi-Hsuan Tsai<sup>6</sup> Xiang Yu<sup>2</sup>  
Samuel Schuster<sup>2</sup> Yumin Suh<sup>2</sup> Mehrtash Harandi<sup>3,5</sup> Manmohan Chandraker<sup>2,4</sup>

<sup>1</sup>The Australian National University <sup>2</sup>NEC Labs America <sup>3</sup>Monash University

<sup>4</sup>University of California, San Diego <sup>5</sup>Data61 <sup>6</sup>Phiar Technologies

sen.christiansimon@gmail.com, mfaraki@nec-labs.com, wasidennis@gmail.com

{xiangyu, samuel, yumin}@nec-labs.com, mehrtash.harandi@monash.edu, manu@nec-labs.com

While the main focus of the supervised experiments is evaluation on the unseen data in leave-one-domain-out protocol, in this supplementary material, we provide additional results on the test sets of the seen domains.

### A. Additional Results on the Seen Domains

In the main paper, we have shown that our proposed approach is superior to all the competitors when evaluating on the unseen domains in the supervised experiments. Here, we provide additional results on seen domains to demonstrate that our methods achieve improvements on all domains, including the seen ones. As we can observe in Table A1, our MSL and MSL + Mov are also superior to other baselines when seen domains are considered. For example, the best accuracy number of 71.0% on DomainNet-Real is obtained by MSL + Mov (see the last row in Table A1) with the gap of 4.3% compared to the recent method of GeoDL.

Furthermore, Table A2 shows that our methods can achieve the best accuracy numbers on the unseen domains of the PACS and NICO datasets. On the seen domains, we observe that the best accuracy number is sometimes about 1-2% better than ours (e.g. on the NICO dataset row-col: water-ground and grass-ground). However, our proposal achieves the best average accuracy over both the test sets of seen and unseen domains.

### References

- [1] Saihui Hou, Xinyu Pan, Chen Change Loy, Zilei Wang, and Dahua Lin. Learning a unified classifier incrementally via rebalancing. In *Proceedings of the IEEE/CVF Conference on Computer Vision and Pattern Recognition (CVPR)*, June 2019. 2
- [2] Zhizhong Li and Derek Hoiem. Learning without forgetting. *IEEE transactions on pattern analysis and machine intelligence*, 40(12):2935–2947, 2017. 2

- [3] Christian Simon, Piotr Koniusz, and Mehrtash Harandi. On learning the geodesic path for incremental learning. In *Proceedings of the IEEE/CVF Conference on Computer Vision and Pattern Recognition*, pages 1591–1600, 2021. 2
- [4] Vladimir N. Vapnik. *Statistical Learning Theory* Wiley. 1998. 2
- [5] Marvin Zhang, Henrik Marklund, Abhishek Gupta, Sergey Levine, and Chelsea Finn. Adaptive risk minimization: A meta-learning approach for tackling group shift. *CoRR*, abs/2007.02931, 2020. 2
- [6] Kaiyang Zhou, Yongxin Yang, Yu Qiao, and Tao Xiang. Domain generalization with mixstyle. In *International Conference on Learning Representations*, 2021. 2

| Method            | DomainNet     |                             |       |      |        |                             |       |      |        |               | OfficeHome                  |         |         |      |                             |         |         |      |     |         |
|-------------------|---------------|-----------------------------|-------|------|--------|-----------------------------|-------|------|--------|---------------|-----------------------------|---------|---------|------|-----------------------------|---------|---------|------|-----|---------|
|                   | Unseen Domain | 10-Task Acc. (%) $\uparrow$ |       |      |        | 5-Tasks Acc. (%) $\uparrow$ |       |      |        | Unseen Domain | 10-Task Acc. (%) $\uparrow$ |         |         |      | 5-Tasks Acc. (%) $\uparrow$ |         |         |      | Art | Product |
|                   |               | Clip                        | Paint | Real | Sketch | Clip                        | Paint | Real | Sketch |               | Art                         | Product | Clipart | Real | Art                         | Product | Clipart | Real |     |         |
| ERM [4]           | Clip          | 60.0                        | 56.7  | 65.4 | 58.7   | 59.7                        | 52.7  | 62.0 | 54.0   | Art           | 48.8                        | 55.8    | 69.1    | 67.1 | 49.7                        | 56.1    | 70.2    | 67.9 |     |         |
|                   | Paint         | 64.4                        | 51.4  | 65.3 | 55.7   | 63.6                        | 50.2  | 61.7 | 55.2   | Product       | 52.7                        | 52.3    | 68.9    | 67.0 | 54.9                        | 51.6    | 64.9    | 61.9 |     |         |
|                   | Real          | 64.6                        | 53.8  | 60.3 | 55.9   | 61.3                        | 50.2  | 57.7 | 54.4   | Clipart       | 52.3                        | 57.0    | 64.7    | 66.1 | 53.8                        | 55.6    | 64.9    | 67.2 |     |         |
|                   | Sketch        | 65.2                        | 56.0  | 65.4 | 53.1   | 61.5                        | 52.9  | 63.0 | 51.7   | Real          | 52.3                        | 54.8    | 66.4    | 62.4 | 51.9                        | 55.4    | 66.6    | 61.9 |     |         |
| LwF [2]           | Clip          | 61.3                        | 57.0  | 67.4 | 58.0   | 62.2                        | 56.8  | 67.6 | 60.3   | Art           | 49.4                        | 57.5    | 69.2    | 67.1 | 49.9                        | 57.8    | 70.8    | 68.2 |     |         |
|                   | Paint         | 64.7                        | 51.9  | 65.4 | 56.4   | 65.2                        | 52.1  | 67.0 | 60.4   | Product       | 53.7                        | 53.8    | 70.5    | 68.1 | 54.8                        | 51.3    | 70.7    | 68.6 |     |         |
|                   | Real          | 65.0                        | 54.7  | 60.0 | 56.1   | 64.89                       | 52.2  | 62.6 | 59.2   | Clipart       | 52.6                        | 57.4    | 65.2    | 66.4 | 54.2                        | 56.4    | 67.5    | 68.5 |     |         |
|                   | Sketch        | 65.8                        | 56.2  | 66.7 | 53.5   | 65.0                        | 54.8  | 66.3 | 54.9   | Real          | 53.1                        | 55.7    | 66.1    | 63.2 | 53.1                        | 55.7    | 66.1    | 63.1 |     |         |
| LUCIR [1]         | Clip          | 61.1                        | 57.1  | 65.7 | 57.9   | 61.3                        | 56.5  | 67.1 | 60.3   | Art           | 49.3                        | 56.2    | 69.0    | 67.2 | 49.7                        | 57.7    | 70.9    | 68.5 |     |         |
|                   | Paint         | 65.0                        | 52.1  | 65.5 | 55.7   | 65.1                        | 52.7  | 66.3 | 59.3   | Product       | 53.4                        | 53.6    | 71.0    | 67.9 | 55.0                        | 51.6    | 70.3    | 68.3 |     |         |
|                   | Real          | 64.9                        | 54.7  | 59.7 | 56.8   | 64.0                        | 52.7  | 61.1 | 59.2   | Clipart       | 52.8                        | 56.4    | 65.7    | 66.3 | 54.3                        | 56.5    | 67.5    | 68.6 |     |         |
|                   | Sketch        | 66.1                        | 56.0  | 65.4 | 53.0   | 64.9                        | 55.2  | 66.4 | 55.4   | Real          | 52.8                        | 55.0    | 66.4    | 62.3 | 53.7                        | 56.4    | 67.2    | 64.9 |     |         |
| GeoDL [3]         | Clip          | 61.0                        | 55.6  | 64.9 | 58.2   | 62.1                        | 56.7  | 67.3 | 60.1   | Art           | 50.6                        | 56.7    | 69.6    | 68.0 | 50.5                        | 57.6    | 71.0    | 68.9 |     |         |
|                   | Paint         | 65.6                        | 50.5  | 64.4 | 56.2   | 64.9                        | 52.8  | 66.8 | 59.6   | Product       | 51.9                        | 53.0    | 69.7    | 67.2 | 54.6                        | 52.4    | 70.4    | 68.4 |     |         |
|                   | Real          | 64.7                        | 53.1  | 58.5 | 57.5   | 63.8                        | 53.0  | 61.1 | 59.1   | Clipart       | 54.5                        | 58.4    | 67.1    | 68.3 | 54.4                        | 56.5    | 67.4    | 68.7 |     |         |
|                   | Sketch        | 65.8                        | 56.0  | 66.7 | 54.1   | 65.1                        | 55.1  | 66.2 | 55.5   | Real          | 52.5                        | 55.9    | 67.0    | 63.1 | 53.6                        | 55.7    | 66.8    | 64.2 |     |         |
| ARM [5]           | Clip          | 57.0                        | 50.9  | 65.0 | 50.5   | 55.4                        | 52.2  | 64.5 | 49.9   | Art           | 39.8                        | 56.2    | 58.2    | 51.7 | 43.6                        | 58.4    | 61.7    | 57.0 |     |         |
|                   | Paint         | 61.1                        | 49.3  | 64.0 | 52.9   | 62.7                        | 51.8  | 66.3 | 54.4   | Product       | 46.4                        | 55.0    | 60.3    | 54.8 | 50.0                        | 56.3    | 62.8    | 58.3 |     |         |
|                   | Real          | 60.4                        | 51.7  | 62.3 | 52.9   | 59.2                        | 51.6  | 60.2 | 53.0   | Clipart       | 45.3                        | 55.4    | 54.3    | 53.0 | 48.7                        | 56.9    | 54.5    | 54.8 |     |         |
|                   | Sketch        | 61.9                        | 52.5  | 65.8 | 51.2   | 60.2                        | 53.0  | 64.6 | 47.7   | Real          | 43.6                        | 54.7    | 56.6    | 51.7 | 48.7                        | 56.8    | 60.4    | 55.4 |     |         |
| MixStyle [6]      | Clip          | 58.0                        | 53.4  | 65.7 | 52.7   | 59.6                        | 56.1  | 69.8 | 55.5   | Art           | 47.3                        | 60.7    | 65.1    | 60.5 | 48.9                        | 60.9    | 65.8    | 61.3 |     |         |
|                   | Paint         | 60.7                        | 51.4  | 65.6 | 52.3   | 65.5                        | 48.5  | 69.4 | 57.0   | Product       | 48.6                        | 54.9    | 65.1    | 61.0 | 51.2                        | 56.9    | 68.1    | 65.2 |     |         |
|                   | Real          | 60.8                        | 53.4  | 59.5 | 54.6   | 63.6                        | 57.3  | 56.0 | 57.2   | Clipart       | 48.5                        | 58.9    | 56.3    | 57.3 | 50.0                        | 61.6    | 57.7    | 58.7 |     |         |
|                   | Sketch        | 62.3                        | 53.7  | 66.8 | 52.5   | 63.8                        | 57.6  | 69.2 | 53.5   | Real          | 48.2                        | 56.7    | 62.5    | 56.0 | 49.4                        | 59.3    | 65.3    | 59.8 |     |         |
| MSL (ours)        | Clip          | 63.2                        | 56.6  | 68.1 | 59.1   | 63.3                        | 58.3  | 70.4 | 61.5   | Art           | 61.6                        | 64.1    | 75.5    | 74.5 | 54.3                        | 64.9    | 72.6    | 68.0 |     |         |
|                   | Paint         | 67.1                        | 51.3  | 67.2 | 58.3   | 65.8                        | 55.4  | 69.1 | 60.9   | Product       | 61.5                        | 61.4    | 77.7    | 74.6 | 59.1                        | 63.6    | 73.1    | 69.9 |     |         |
|                   | Real          | 67.2                        | 55.5  | 61.8 | 57.5   | 64.7                        | 54.2  | 63.6 | 60.0   | Clipart       | 60.4                        | 63.0    | 71.7    | 73.1 | 60.3                        | 64.6    | 68.0    | 67.5 |     |         |
|                   | Sketch        | 67.8                        | 57.7  | 67.9 | 55.6   | 65.4                        | 57.1  | 68.6 | 57.4   | Real          | 61.5                        | 64.4    | 74.9    | 72.7 | 58.8                        | 63.6    | 70.6    | 67.3 |     |         |
| MSL + Mov. (ours) | Clip          | 63.7                        | 58.2  | 71.0 | 60.9   | 63.8                        | 58.9  | 71.1 | 62.6   | Art           | 61.2                        | 65.7    | 76.8    | 75.1 | 57.9                        | 63.4    | 75.3    | 74.0 |     |         |
|                   | Paint         | 68.0                        | 55.0  | 69.5 | 58.7   | 66.4                        | 55.3  | 69.7 | 61.3   | Product       | 63.3                        | 63.0    | 76.4    | 75.2 | 60.3                        | 60.2    | 75.1    | 74.9 |     |         |
|                   | Real          | 67.7                        | 57.7  | 63.1 | 59.8   | 65.7                        | 55.2  | 64.6 | 61.4   | Clipart       | 63.7                        | 64.3    | 75.3    | 73.7 | 60.3                        | 61.8    | 71.4    | 73.2 |     |         |
|                   | Sketch        | 68.1                        | 60.6  | 71.0 | 56.4   | 66.6                        | 58.0  | 69.3 | 58.3   | Real          | 61.3                        | 64.9    | 73.7    | 73.1 | 56.6                        | 62.5    | 73.0    | 70.9 |     |         |

Table A1. Cross-domain continual learning average accuracy with 10-tasks and 5-tasks protocols, and 10 exemplar size and 5 exemplar size in the memory on DomainNet and OfficeHome datasets, respectively. Within each block that corresponds to a method, the domain shown in the beginning of each row is excluded from training, while each column shows the achieved accuracy when a test set of a domain is used. Therefore, the grey cells show the accuracy on unseen domains in leave-one-domain-out protocol while the off-diagonal cells are the accuracy numbers on the test set of seen domains.

| Method           | PACS          |      |         |       |        | NICO          |        |        |       |       |
|------------------|---------------|------|---------|-------|--------|---------------|--------|--------|-------|-------|
|                  | Unseen Domain | Art  | Cartoon | Photo | Sketch | Unseen Domain | Eating | Ground | Water | Grass |
| ERM [4]          | Art           | 88.0 | 86.4    | 84.0  | 83.8   | Eating        | 76.3   | 85.1   | 89.1  | 69.8  |
|                  | Cartoon       | 89.5 | 86.7    | 86.2  | 85.3   | Ground        | 76.6   | 82.9   | 85.3  | 68.0  |
|                  | Photo         | 87.3 | 86.1    | 82.3  | 85.1   | Water         | 74.1   | 81.2   | 84.7  | 70.6  |
|                  | Sketch        | 88.6 | 86.5    | 83.6  | 84.3   | Grass         | 76.7   | 81.3   | 85.9  | 61.9  |
| LwF [2]          | Art           | 88.2 | 86.8    | 83.7  | 83.8   | Eating        | 76.4   | 84.7   | 89.3  | 69.6  |
|                  | Cartoon       | 89.4 | 86.2    | 85.8  | 84.7   | Ground        | 76.6   | 82.4   | 84.8  | 67.3  |
|                  | Photo         | 86.9 | 86.9    | 83.3  | 85.7   | Water         | 74.3   | 81.7   | 85.5  | 70.7  |
|                  | Sketch        | 88.3 | 86.6    | 83.4  | 84.3   | Grass         | 76.9   | 81.1   | 85.6  | 62.4  |
| LUCIR [1]        | Art           | 88.1 | 87.1    | 83.8  | 84.4   | Eating        | 76.5   | 84.9   | 89.5  | 69.4  |
|                  | Cartoon       | 89.6 | 86.6    | 85.6  | 85.3   | Ground        | 76.8   | 82.1   | 85.5  | 67.4  |
|                  | Photo         | 87.0 | 87.1    | 83.5  | 85.1   | Water         | 73.5   | 82.2   | 84.2  | 69.5  |
|                  | Sketch        | 88.5 | 86.8    | 83.3  | 83.8   | Grass         | 77.2   | 81.0   | 85.9  | 62.1  |
| GeoDL [3]        | Art           | 87.0 | 86.7    | 83.2  | 85.6   | Eating        | 72.8   | 86.8   | 86.5  | 67.5  |
|                  | Cartoon       | 88.3 | 85.0    | 84.8  | 85.4   | Ground        | 76.2   | 83.6   | 87.3  | 64.1  |
|                  | Photo         | 87.6 | 87.5    | 82.0  | 86.5   | Water         | 73.0   | 86.4   | 85.4  | 68.4  |
|                  | Sketch        | 88.4 | 87.4    | 84.0  | 84.3   | Grass         | 77.6   | 85.9   | 87.2  | 60.5  |
| ARM [5]          | Art           | 86.2 | 85.6    | 82.6  | 86.5   | Eating        | 65.1   | 83.8   | 80.1  | 66.0  |
|                  | Cartoon       | 86.2 | 83.5    | 84.2  | 83.4   | Ground        | 73.5   | 83.3   | 85.4  | 63.7  |
|                  | Photo         | 88.1 | 85.6    | 80.8  | 84.4   | Water         | 72.5   | 87.6   | 84.9  | 69.8  |
|                  | Sketch        | 85.0 | 87.3    | 81.9  | 83.5   | Grass         | 72.3   | 83.4   | 83.6  | 64.9  |
| MixStyle [6]     | Art           | 86.1 | 85.1    | 83.8  | 81.6   | Eating        | 73.3   | 85.8   | 86.6  | 68.6  |
|                  | Cartoon       | 89.4 | 84.0    | 84.5  | 84.0   | Ground        | 75.1   | 82.6   | 86.1  | 61.3  |
|                  | Photo         | 86.8 | 86.1    | 81.0  | 84.1   | Water         | 70.5   | 85.6   | 81.1  | 68.5  |
|                  | Sketch        | 88.6 | 86.6    | 82.8  | 83.4   | Grass         | 76.9   | 82.1   | 87.3  | 63.6  |
| MSL (ours)       | Art           | 89.9 | 88.9    | 84.9  | 85.8   | Eating        | 77.3   | 85.9   | 90.0  | 69.2  |
|                  | Cartoon       | 89.6 | 86.2    | 85.7  | 84.3   | Ground        | 81.6   | 82.1   | 91.2  | 69.3  |
|                  | photo         | 90.0 | 87.0    | 84.4  | 84.5   | Water         | 77.8   | 84.8   | 87.0  | 75.0  |
|                  | Sketch        | 88.6 | 88.3    | 84.4  | 85.1   | Grass         | 80.5   | 84.1   | 90.2  | 62.8  |
| MSL + Mov (ours) | Art           | 91.3 | 89.8    | 86.3  | 88.2   | Eating        | 77.2   | 85.4   | 90.3  | 68.6  |
|                  | Cartoon       | 91.4 | 87.9    | 86.3  | 86.7   | Ground        | 76.4   | 84.1   | 88.0  | 65.5  |
|                  | Photo         | 91.0 | 90.2    | 85.0  | 86.5   | Water         | 76.7   | 85.6   | 89.0  | 66.9  |
|                  | Sketch        | 89.9 | 89.8    | 86.5  | 87.2   | Grass         | 77.2   | 84.7   | 89.5  | 64.9  |

Table A2. Cross-domain continual learning average accuracy with the 2-tasks protocol, and 5 exemplar size in the memory on PACS and NICO datasets. Within each block that corresponds to a method, the domain shown in the beginning of each row is excluded from training, while each column shows the achieved accuracy when a test set of a domain is used. Therefore, the grey cells show the accuracy on unseen domains in leave-one-domain-out protocol while the off-diagonal cells are the accuracy numbers on the test set of seen domains.
